# Supplementary material for: Class I BASIC PENTACYSTEINE factors regulate HOMEOBOX genes involved in meristem size maintenance
Source: PubMed Central journal article supplement (PMC3967085; doi:10.1093/jxb/eru003), 2014-01-30
Supplement: supp_eru003_jexbot107656_file001.pdf [file supp_eru003_jexbot107656_file001.pdf]

## Supplementary Figure 1

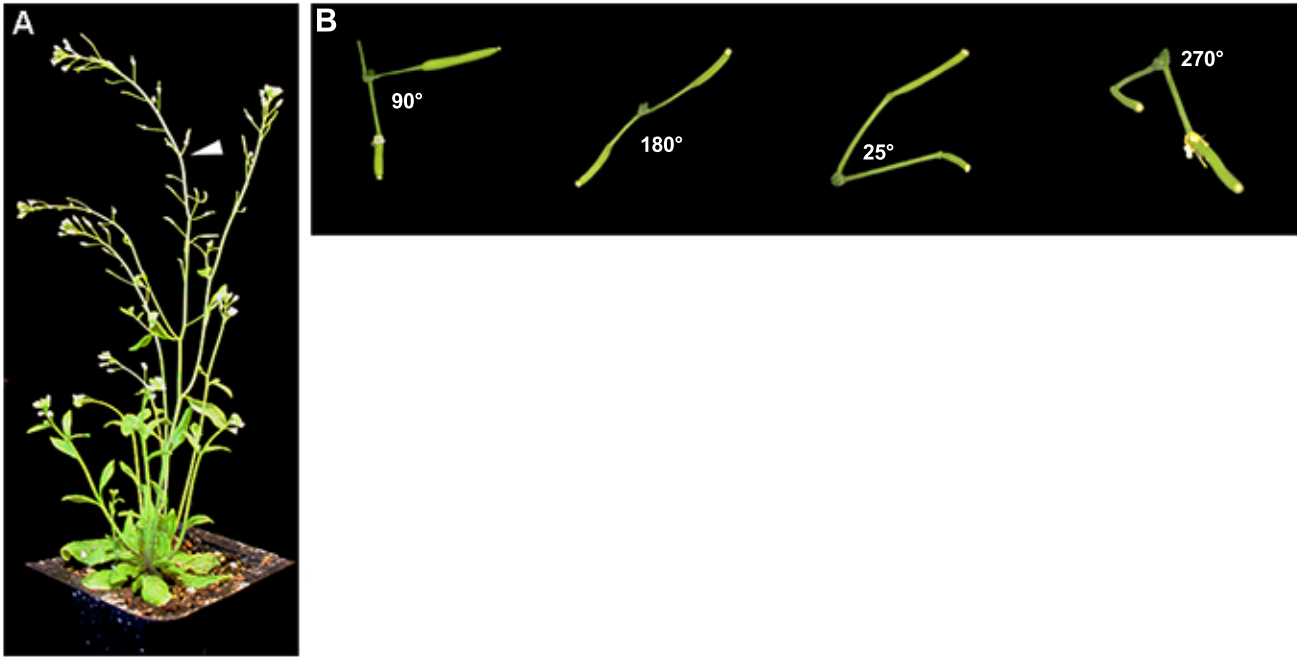

### Supplementary Figure 1. Angle divergence in *bpc1-2 bpc2 bpc3* mutant

- (A) *bpc1-2 bpc2 bpc3* plant. Siliques are randomly positioned along the stem and two siliques arising from the same internode can be frequently observed (arrowhead).
- (B) Four examples of divergence angles frequently found in the *bpc1-2 bpc2 bpc3* mutant: from left to right 90°, 180°, 25°, 270°.

Supplementary Figure 2.

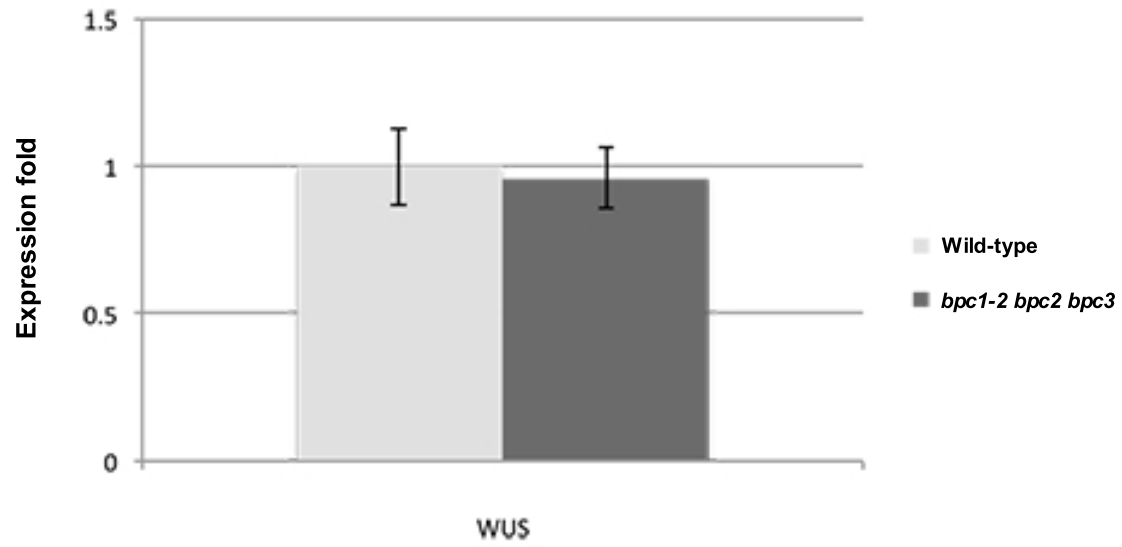

Supplementary Figure 2. Expression level of *WUS* in *bpc1-2 bpc2 bpc3* mutant.

## Supplementary Figure 3

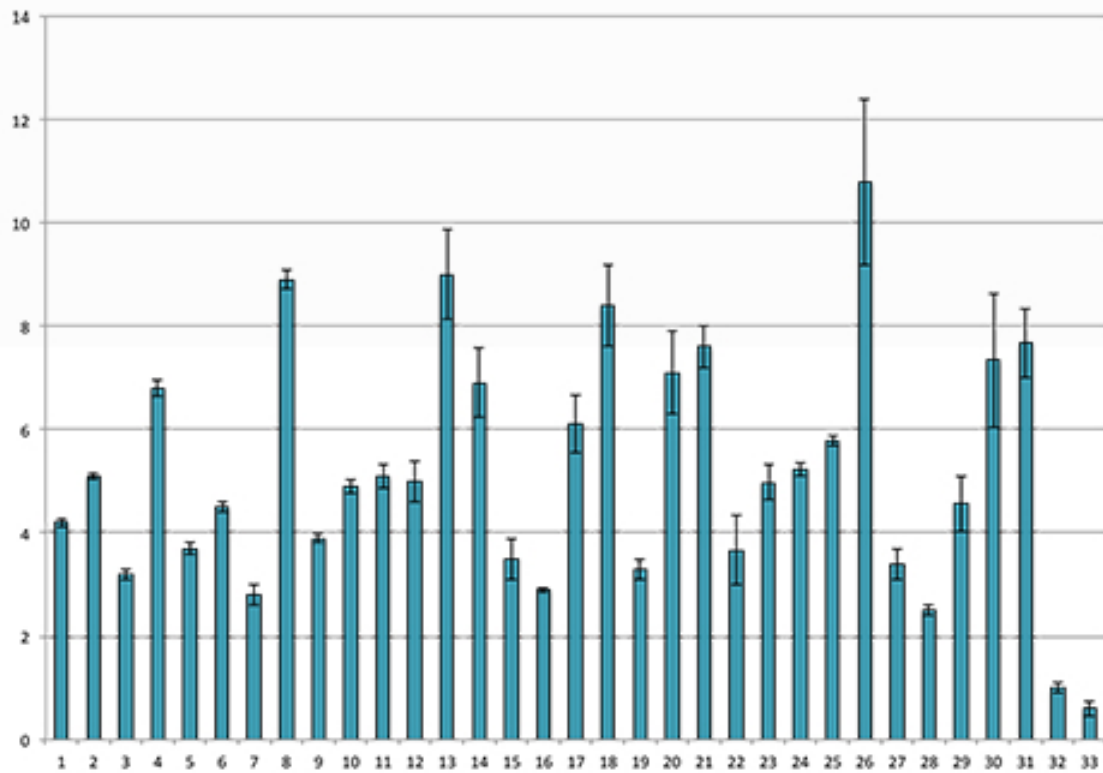

### Supplementary Figure 3. Expression level of BPC1-Ear Motif in plants with strong phenotype.

From number 1 to number 31: *35S::BPC1 Ear Motif* plants with phenotype.

Numbers 32 and 33: *35S::BPC1 Ear Motif* plants with wild-type phenotype.



**Supplementary table 1. HOMEODOMAIN genes with GAGA stretch in their promoter sequence (500bp upstream the transcription start site). Green box: at least one GAGA stretch found. Red box: no GAGA sequence found.**

| Locus     | Gene Name  | GAGA  | Locus     | Gene Name     | GAGA  |
|-----------|------------|-------|-----------|---------------|-------|
| At4g00730 | ANL2       | Green | At1g73360 | HDG11         | Green |
| At4g32980 | ATH1       | Red   | At1g27050 | ATHB54        | Red   |
| At3g01470 | Athb-1     | Green | At1g70920 | ATHB18        | Green |
| At1g79840 | Athb-10    | Green | At1g05230 | HDG2          | Green |
| At3g61890 | Athb-12    | Green | At1g34650 | HDG10         | Red   |
| At1g69780 | Athb-13    | Green | At2g18550 | ATHB21        | Green |
| At2g34710 | PHB        | Green | At2g32370 | HDG3          | Red   |
| At1g52150 | CNA        | Green | At2g36610 | ATHB22        | Red   |
| At4g40060 | Athb-16    | Green | At3g03260 | HDG8          | Green |
| At2g01430 | Athb-17    | Green | At4g36740 | ATHB40        | Red   |
| At4g16780 | Athb-2     | Red   | At5g17320 | HDG9          | Red   |
| At5g15150 | Athb-3     | Green | At5g52170 | HDG7          | Red   |
| At2g44910 | Athb-4     | Green | At5g03790 | ATHB51        | Red   |
| At5g65310 | Athb-5     | Green | At5g66700 | ATHB53        | Red   |
| At2g22430 | Athb-6     | Green | At5g46880 | HDG5          | Green |
| At2g46680 | Athb-7     | Red   | At1g28420 | HB-1          | Red   |
| At4g32880 | Athb-8     | Green | At1g75430 | BLH11         | Green |
| At1g30490 | PHV        | Green | At2g16400 | BLH7          | Red   |
| At4g21750 | ATML1      | Green | At2g27220 | BLH5          | Red   |
| At5g41410 | BEL1       | Green | At2g35940 | BLH1          | Green |
| At4g36870 | BLH2       | Green | At4g34610 | BLH6          | Red   |
| At1g75410 | BLH3       | Green | At5g44180 |               | Red   |
| At2g23760 | BLH4       | Green | At5g46010 |               | Red   |
| At1g19700 | BLH5       | Red   | At4g03250 |               | Red   |
| At5g02030 | BLR        | Green | At5g53980 | ATHB52        | Green |
| At4g25530 | FWA        | Red   | At4g04890 | PDF2          | Green |
| At4g17460 | HAT1       | Red   | At2g27990 | POUND-FOOLISH | Red   |
| At5g06710 | HAT14      | Red   | At4g29940 | PRHA          | Green |
| At5g47370 | HAT2       | Green | At5g60690 | REV           | Green |
| At4g37790 | HAT22      | Green | At1g62360 | STM           | Green |
| At3g60390 | HAT3       | Red   | At3g18010 | WOX1          | Green |
| At3g19510 | HAT3.1     | Green | At1g20710 | WOX10/WOX13B  | Green |
| At2g22800 | HAT9       | Red   | At3g03660 | WOX11         | Red   |
| At3g61150 | HD-GL2-1   | Green | At5g17810 | WOX12         | Red   |
| At4g08150 | KNAT1 (BP) | Green | At4g35550 | WOX13         | Red   |
| At1g70510 | KNAT2      | Green | At1g20700 | WOX14         | Red   |
| At5g25220 | KNAT3      | Green | At5g59340 | WOX2          | Green |
| At5g11060 | KNAT4      | Green | At2g28610 | WOX3          | Green |
| At4g32040 | KNAT5      | Green | At1g46480 | WOX4          | Red   |
| At1g23380 | KNAT6      | Green | At3g11260 | WOX5          | Red   |
| At1g62990 | KNAT7      | Green | At2g01500 | WOX6          | Red   |
| At4g02560 | LD         | Green | At5g05770 | WOX7          | Red   |
| At4g17710 | HDG4       | Red   | At5g45980 | WOX8          | Red   |
| At1g26960 | ATHB23     | Red   | At2g33880 | WOX9          | Green |
| At3g01220 | ATHB20     | Green |           |               |       |
| At1g17920 | HDG12      | Green |           |               |       |

**Supplementary table 2. Primer used in this manuscript.**

| Gene                                       | Primer sequences                                                                                          |
|--------------------------------------------|-----------------------------------------------------------------------------------------------------------|
| <b><i>BPC1-EAR motif</i></b><br>construct  | Fw- CACCATGGACGATGATGGATTTTCGC<br>Rev- CTAAGCAAATCCAAGTCTAAGTTCAAGATC<br>AAGATCAAGTCTGATCGTGACAAACTTATTGG |
| <b><i>BPC1-EAR motif</i></b><br>expression | Fw- GCTCTTGTTTTCTTCATTGATCG<br>Rev- CAAGATCAAGATCAAGTCTGATCGTGACAAACTTATTGG                               |
| <b><i>KNAT4</i></b> promoter               | Fw- CGTCAAACACACATACACATCG<br>Rev- GATGTTGTTGTTGGTCGGTG                                                   |
| <b><i>KNAT5</i></b> promoter               | Fw- ACTCTCCCGTCACATTCTGG<br>Rev- GTCTTGGATTAGTTGAGCGG                                                     |
| <b><i>KNAT6</i></b> promoter               | Fw- CGACCTATGAAGCCTGAAGC<br>Rev- CTCCTCCGTCTTCTAAATCGC                                                    |
| <b><i>KNAT7</i></b> promoter               | Fw- GGACCAGACCCGTGTATAAC<br>Rev- TACCTAGTGCCGCTTCTTGC                                                     |
| <b><i>BP</i></b> promoter                  | Fw- TCAATCCACTCAAGCCACCC<br>Rev- TCGTCAAGGAAGTGACATGG                                                     |
| <b><i>BP</i></b> expression                | Fw- CACCGTCTGTCTCTGCCTCC<br>Rev- TCCCCTCCGCTGTTATTCTC                                                     |
| <b><i>STM</i></b> promoter                 | Fw- CTTACTCTTTTAGGGTTTCC<br>Rev- ATCATAGGACACATCGGACC                                                     |
| <b><i>STM</i></b> expression               | Fw- CCTCACCTTCCTCTTTCTCC<br>Rev- TGTTGACGAGCTTCTTTAGG                                                     |
| <b><i>WUS</i></b> promoter                 | Fw- AAGCACATTTTTCAATAGGG<br>Rev- CGGCTTGATGATGATGATGC                                                     |
| <b><i>WUS</i></b> expression               | <i>Gregis et al., 2013</i>                                                                                |
| <b><i>WOX3</i></b> promoter                | Fw- TGGGAGCATATGAGATTGGG<br>Rev- CGGCTTGATGATGATGATGC                                                     |
| <b><i>WOX9</i></b> promoter                | Fw- ATGAAAACAGGTTGGGTAGG<br>Rev- AGAGACAGGGAACAGAATGG                                                     |
| <b><i>RPL</i></b> promoter                 | Fw- TGCTCATACTAAATTCCTCC<br>Rev- GGATGATGTCGATGAGATGC                                                     |
| <b><i>BLH1</i></b> promoter                | Fw- GCGTACTAAGGACTGTGGG<br>Rev- ATCATCTCAAGCTGCAAAGG                                                      |
| <b><i>CRN</i></b> promoter                 | Fw- CTTTACAGGCATTATTGGG<br>Rev- GGAATGGGGAAGGTCAGAGG                                                      |
| <b><i>ARR7</i></b> promoter                | Fw- AAAGTTCCAGGTCACGAGGG<br>Rev- AGGTGGTGGGGTTTAATAAG                                                     |
| <b><i>IPT7</i></b> expression              | <i>Takano et al., 2010</i>                                                                                |
